# Supplementary material for: Fungal Virulence and Development Is Regulated by Alternative Pre-mRNA 3′End Processing in Magnaporthe oryzae
Source: PLOS journal article supplement (doi:10.1371/journal.ppat.1002441), 2011-12-15
Supplement: S5 (10.1371/journal.ppat.1002441.s005) [file journal.ppat.1002441.s005]

# Figure S5

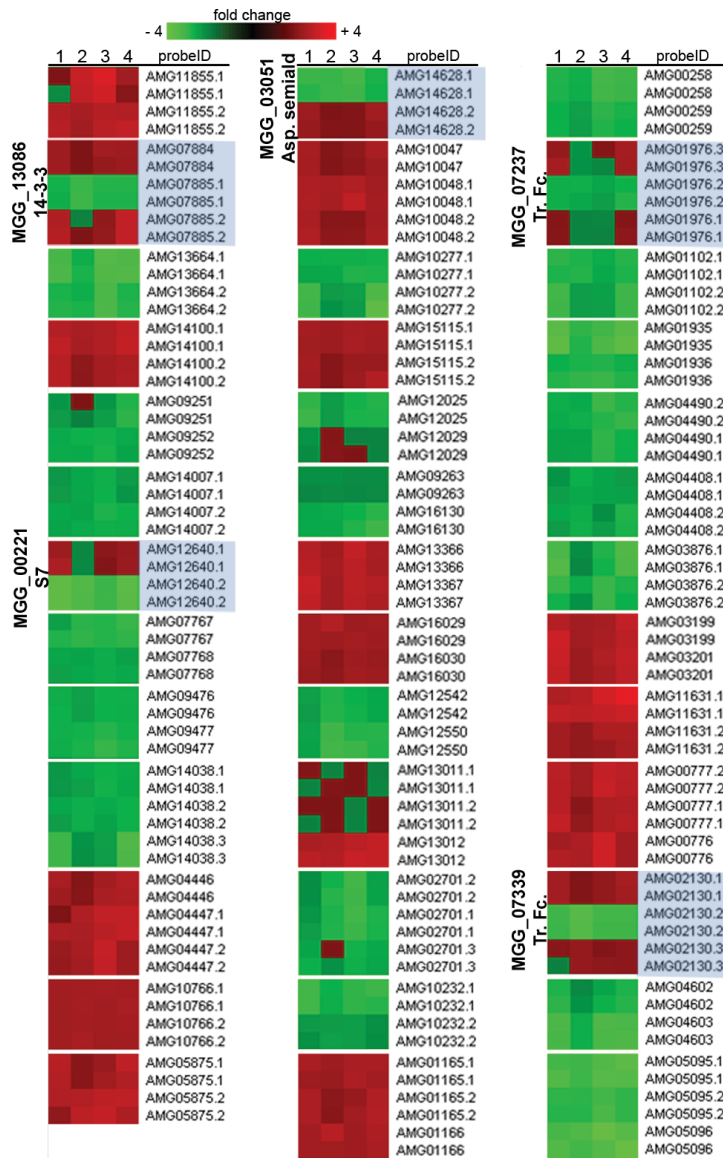

**Figure S5. Identification of mRNAs with altered 3'end processing in  $\Delta rbp35$ .**

Heat map of the 39 genes up- or down-regulated in  $\Delta rbp35$  that contain two or more microarray-oligos. Lanes 1 to 4 represent four independent hybridisations using RNA extracted from different biological samples. Five genes (indicated in blue) contain 3'UTR probes down-regulated in  $\Delta rbp35$ .
